# Supplementary material
Source: PubMed Central journal article supplement (PMC3096685)
Supplement: NIHMS284279-supplement-1.pdf [file NIHMS284279-supplement-1.pdf]

# **Inhibition of autophagy by caspase 8 cleavage of Beclin 1 following cytochrome *c* release in chemotherapy-induced apoptosis**

**Li et al.**

## **Supplementary Figure Legend**

**Fig. S1. Autophagy induction and Beclin 1 cleavage in *Cyt c*-KI HCT116 cells.** (A) WT and *Cyt c*-KI HCT116 cells were treated with 500 nM camptothecin (CPT) for 24 hr. Cytosolic fractions were isolated and probed for *Cyt c* by Western blotting. Cytochrome oxidase subunit IV (Cox IV) and  $\alpha$ -tubulin, which are expressed in mitochondria and cytosol, respectively, were analyzed as controls for loading and fractionation. (B) WT and *Cyt c*-KI HCT116 cells were treated with 500 nM camptothecin (CPT) for 24 hr, in the absence (Control) or presence of the lysosomal inhibitor chloroquine (40  $\mu$ M) or E64d (10  $\mu$ g/ml). LC3 was analyzed by Western blotting. (C) WT and *Cyt c*-KI HCT116 cells were transfected with V5-tagged Beclin 1 for 20 hr, and then treated with 500 nM of CPT for 24 hr. V5 expression was analyzed by Western blotting. Arrowheads indicate Beclin 1 cleavage fragments. (D) WT and *Cyt c*-KI HCT116 cells were treated with staurosporine (STS, 100 nM) or infected with an adenovirus expressing PUMA (Ad-PUMA, 10 MOI) for 48 hr. Beclin 1 expression was analyzed by Western blotting following treatment. Arrowheads indicate Beclin 1 cleavage fragments. (E) Western blot analysis of Beclin 1 in Caco2, RKO, and LoVo colon cancer cells treated with 500 nM CPT for 24 hr, in the presence or absence of the pan-caspase inhibitor zVAD-fmk at 20  $\mu$ M.

**Fig. S2. Caspase 8-mediated cleavage of Beclin 1 during apoptosis induced by anticancer agents.** (A) Purified GST-Beclin 1 was incubated with active caspase 3, 8, or 9 at 37°C for 1 hr, and then analyzed by SDS-PAGE and Western blotting. *Left*, protein staining of SDS-PAGE.

*Middle*, Western blot with anti-Beclin 1 (C-terminal) antibody. *Right*, Western blot with anti-GST antibody. Arrowheads indicate Beclin 1 cleavage fragments. **(B)** HCT116 cells were transduced with a lentivirus expressing human *caspase 8*-specific shRNA and stable cell lines were isolated. Caspase 8 expression in the parental and *caspase 8*-knockdown (*Casp 8-KD*) HCT116 cells was analyzed by Western blotting. **(C)** Parental and *Casp 8-KD* HCT116 cells were transfected with V5-tagged Beclin 1, and then treated with 500 nM CPT for 24 hr. V5 expression was analyzed by Western blotting. Arrowheads indicate Beclin 1 cleavage fragments. **(D)** Parental and *Casp 8-KD* HCT116 cells were treated with staurosporine (STS, 100 nM). Beclin 1 expression was analyzed by Western blotting following the treatment. Arrowheads indicate Beclin 1 cleavage fragments. **(E)** Parental and *Casp 8-KD* HCT116 transfected with GFP-LC3 were treated with 500 nM CPT for 24 hr. GFP-LC3 punctuate signals were quantified. \* $p < 0.05$ . Values were means  $\pm$  SD of three independent experiments, with 300 cells counted in each experiment.

**Fig. S3. Identifying caspase 8 cleavage sites of Beclin 1.** **(A)** HCT116 cells were transfected with V5-tagged WT or deletion mutant of Beclin 1, and then treated with 500 nM CPT for 24 hr. Transfected protein was analyzed by V5 Western blotting. Arrowheads indicate Beclin 1 cleavage fragments. **(B)** HCT116 cells were transfected with V5-tagged WT or indicated point mutants of Beclin 1, and then treated with 500 nM CPT for 24 hr. Transfected protein was analyzed by V5 Western blotting. **(C)** Purified GST-tagged WT and double mutant (DM, D133A/D146A) Beclin 1 were incubated with active caspase 3, 8, or 9 at 37°C for 1 hr, followed by SDS-PAGE analysis. A gel code blue staining picture of SDS PAGE is shown.

**Fig. S4. Beclin 1 cleavage fragments lose autophagy function.** **(A)** HCT116 cells were transfected with full-length Beclin 1 (WT Beclin 1), D133A/D146A double mutant (DM Beclin

1), N-terminal cleavage fragment of Beclin 1 (N-Beclin 1), or C-terminal cleavage fragment of Beclin 1 (C-Beclin 1). After transfection, cells were treated with 500 nM CPT for 24 hr in the presence of E64d (10  $\mu$ g/ml) and pepstatin A (10  $\mu$ g/ml). LC3 was analyzed by Western blotting. **(B)** Following transfection of HCT116 cells with WT Beclin 1, N-Beclin 1, or C-Beclin 1 and CPT treatment as in (A), apoptosis was analyzed by counting cells with condensed and fragmented nuclei following nuclear staining with Hoechst 33258. Values were means  $\pm$  SD of three independent experiments, with 300 cells counted in each experiment. **(C)** Following transfection and CPT treatment as in (A), mitochondrial and cytosolic fractions were isolated and probed for transfected Beclin 1 by V5 Western blotting. Cox IV and  $\alpha$ -tubulin were analyzed as the controls for loading and fractionation.

**Fig. S5. Induction of autophagy in *Beclin 1*-KI HCT116 cells.** **(A)** WT and *Beclin 1*-KI HCT116 cells were treated with 500 nM CPT for 24 hr, in the absence (Control) or presence of the lysosomal inhibitor chloroquine (40  $\mu$ M) or E64d (10  $\mu$ g/ml). LC3 was analyzed by Western blotting. **(B)** WT and *Beclin 1*-KI HCT116 cells transfected with GFP-LC3 were serum starved for 24 hr, exposed to 10  $\mu$ M rapamycin for 24 hr, or treated with amino acid starvation for 3 hr. For amino acid starvation, cells were cultured in EBSS medium in the presence of E64d (2  $\mu$ g/ml) and pepstatinA (2  $\mu$ g/ml). GFP-LC3 puncta signals in the treated cells were quantified.

\*\*  $p < 0.01$ . Values were means  $\pm$  SD of three independent experiments.

Figure S1

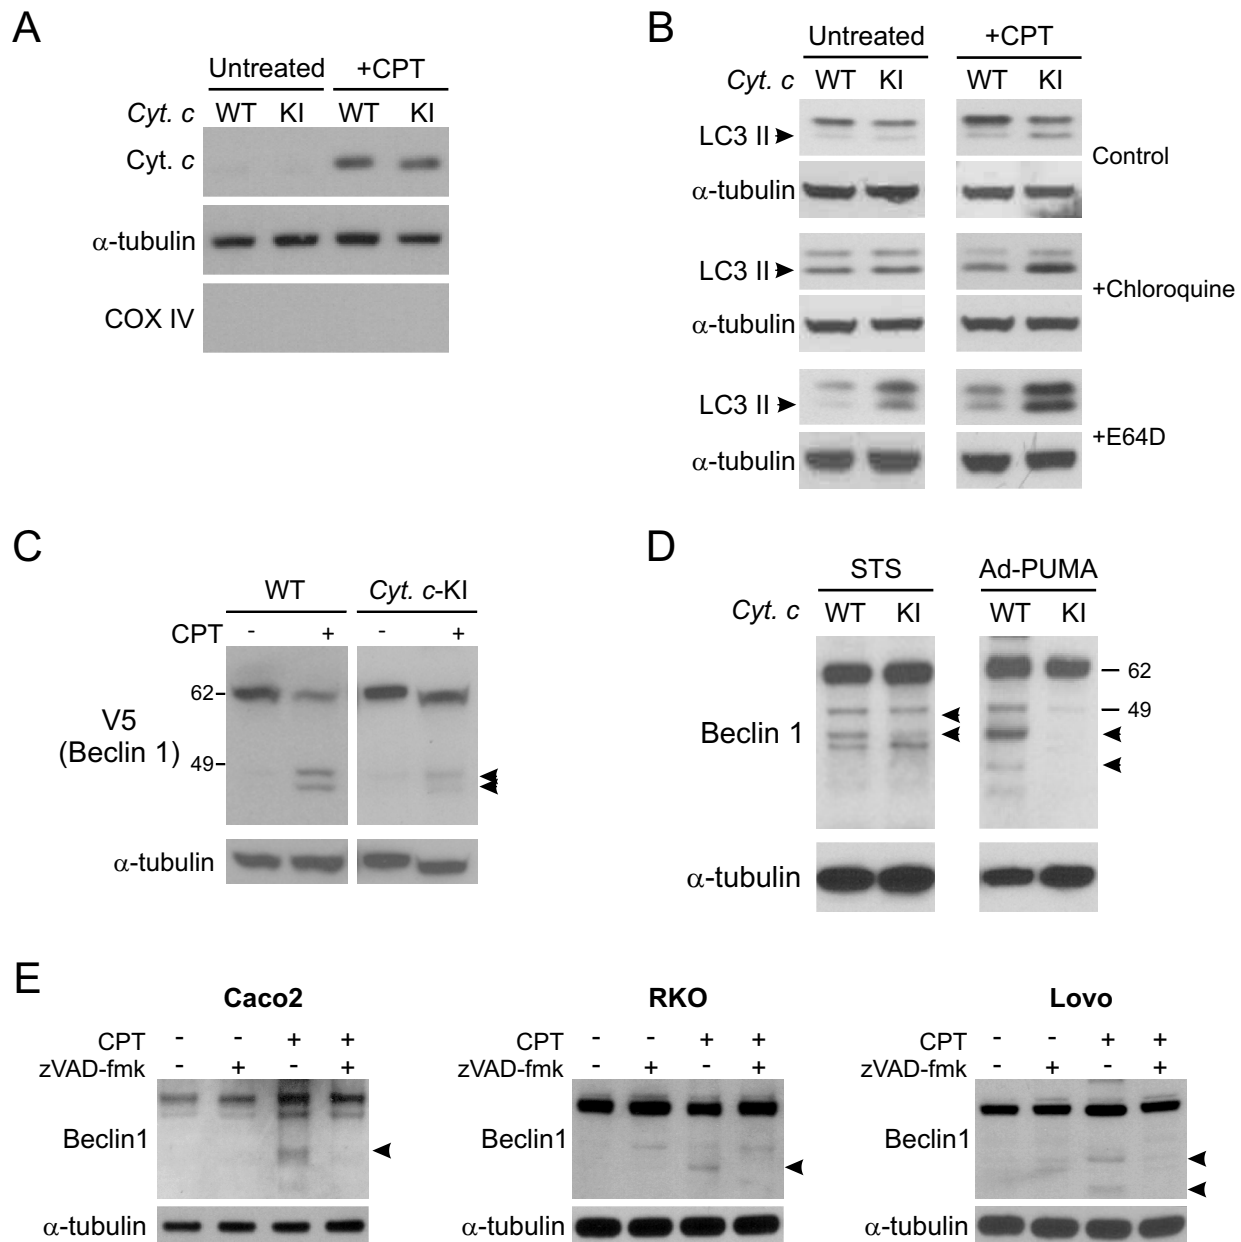

Figure S2

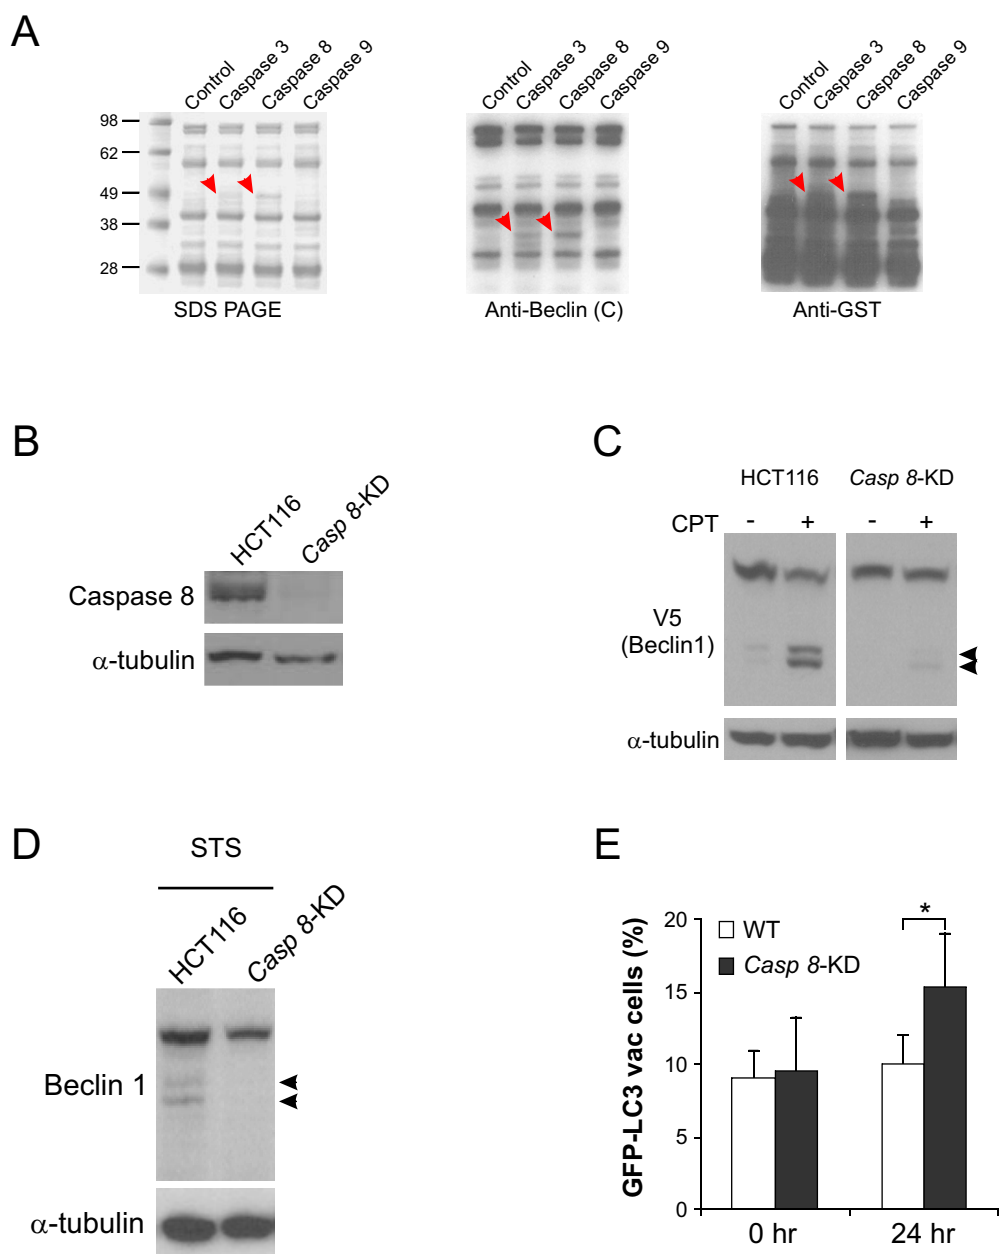

Figure S3

A

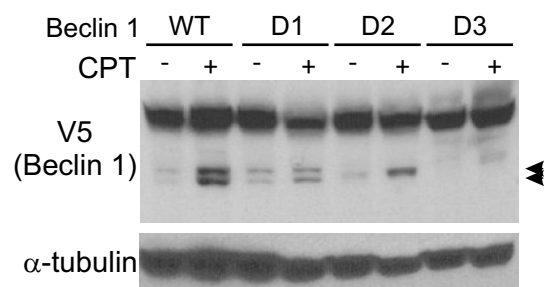

B

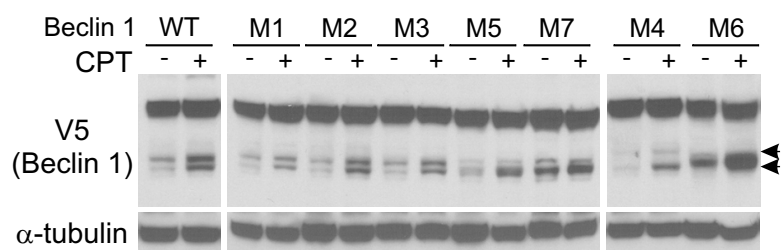

C

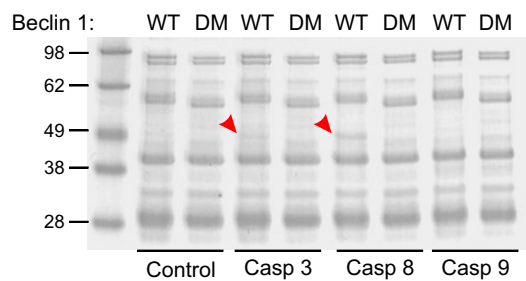

Figure S4

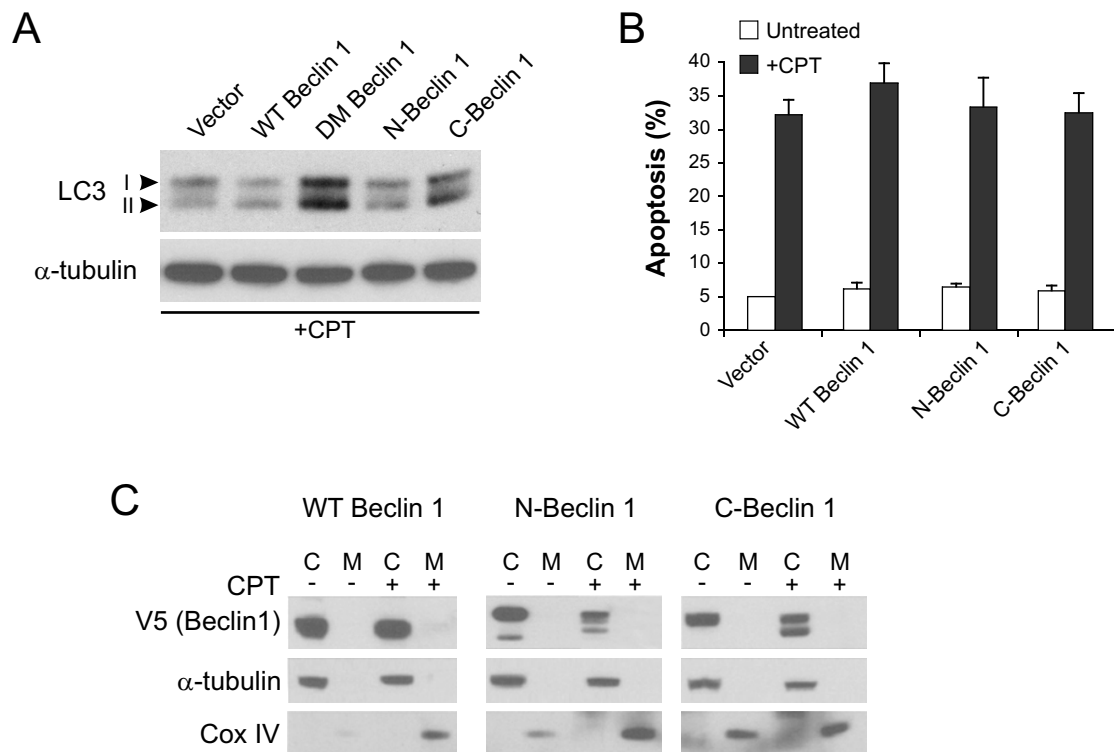

Figure S5

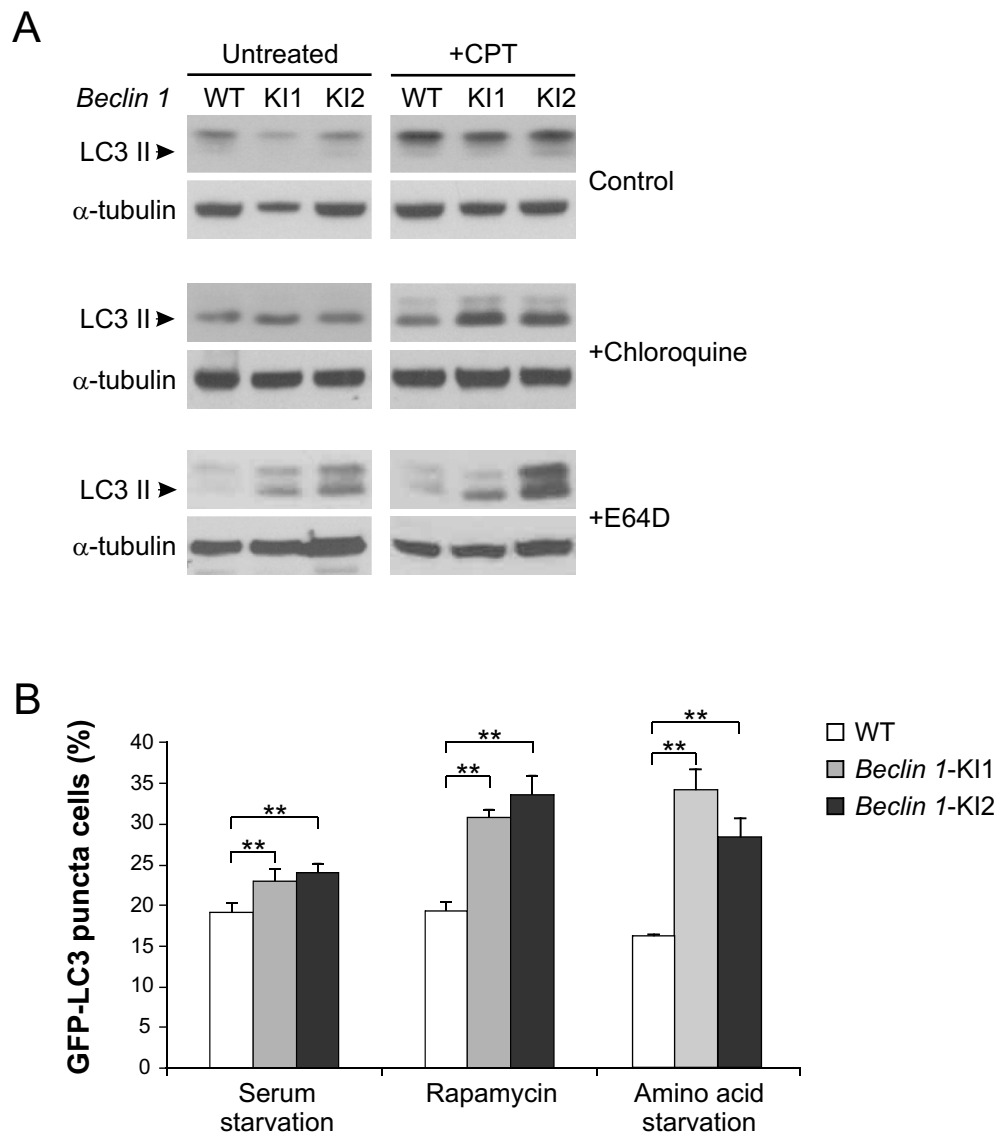



**Table S1. Primers used for *Beclin 1* knock-in vector construction and PCR screen**

| Purpose                    | Orientation        | Sequence                                          |
|----------------------------|--------------------|---------------------------------------------------|
| <b>Vector construction</b> |                    |                                                   |
| Left homologous arm        | Forward            | 5'-GGG AAA GUg cag gca gtg aag agt cca gga gcc-3' |
|                            | Reverse            | 5'-GGA GAC AUg acc tcc caa ggg tac ctc tct ccc-3' |
| Right homologous arm       | Forward            | 5'-GGTCCCAUct tgagagtctc tgccactggc-3'            |
|                            | Reverse            | 5'-GGCATAGUtgctaggact acaggtctac cac-3'           |
| <b>First round screen</b>  |                    |                                                   |
| Left arm                   | Forward            | 5'-gggatcctgt ggagcaacat cctg-3'                  |
|                            | <i>Neo</i> reverse | 5'- ttg tgc cca gtc ata gcc g-3'                  |
| Right arm                  | <i>Neo</i> forward | 5'- tct tga cga gtt ctt ctt ag-3'                 |
|                            | Reverse            | 5'-cca tga act ggc cat aat tgg cct-3'             |
| <b>Second round screen</b> |                    |                                                   |
| Right arm                  | Reverse            | 5'-gtgc attcctcaca gagtgggtg tg -3'               |
|                            | Reverse            | 5'-cg ttgagctgag tgccagctg tg-3'                  |

Capital letters: incorporated restriction enzyme site sequences
